# Supplementary material
Source: publisher figshare collection journal article supplement (https://frontiersin.figshare.com/ndownloader/files/14245295)
Supplement: Supplementary file 1 [file 14245295]

Supplementary Material

***Salmonella* Harborage Sites in Infected Poultry thatMay Contribute to Contamination of Ground Meat**

**Claire-Sophie Rimet 1, John J. Maurer1,2, Larissa Pickler3, Lisa Stabler1, Kasey K. Johnson1, Roy D. Berghaus4, Ana M. Villegas1, Margie Lee1,2,5, and Monique França1***

1 Poultry Diagnostic and Research Center, Department of Population Health, University of Georgia, Athens, GA, USA

2 Center for Food Safety, College of Agriculture, University of Georgia, Athens, GA, USA

3 Department of Veterinary Medicine, Universidade Federal do Parana, Curitiba, PR, Brazil.

4Department of Population Health, University of Georgia, Athens, GA, USA,

5 Department of Biomedical Sciences and Pathobiology, Virginia-Maryland College of Veterinary Medicine, Virginia Tech, Blacksburg, VA

*** Correspondence:**

Dr. Monique França

mfranca@uga.edu

**Supplementary Table 1.** Location of *Salmonella* in skin, skeletal muscle and bone of infected chickens throughout the experimental period as detected by immunohistochemistry.

| **Days** | **Skin** | | | **Muscle** | | |  |  | **Bone** |
| --- | --- | --- | --- | --- | --- | --- | --- | --- | --- |
| **SH** a | **ST** b | **Location** | **SH** a | **ST** b | **Location** | **SH** a | **ST** b | **Location** |
| 3 | 5/5 | 2/4 | Stratum corneum a,b, dermis a | 3/5 | 4/5 | Connective tissue a,b, lymphatic b | 0/5 | 0/5 | N/A |
| 5 | 5/5 | 5/5 | Stratum corneum a,b, dermis a,b, feather follicle a, lymphatic a | 5/5 | 5/5 | Connective tissue a,b, lymphatic a,b | 1/5 | 2/5 | Bone marrow a,b, physeal vessel b |
| 7 | 4/5 | 2/5 | Stratum corneum a,b, dermis a, feather follicle a | 5/5 | 5/5 | Connective tissue a,b, lymphatic a | 1/5 | 1/5 | Bone marrow a,b |
| 14 | 2/5 | 4/5 | Stratum corneum a,b, dermis b | 4/5 | 3/5 | Connective tissue a,b | 0/5 | 0/5 | N/A |
| 21 | 3/5 | 1/5 | Stratum corneum a,b, feather follicle b | 0/5 | 0/5 | N/A | 0/5 | 0/5 | N/A |
| 28 | 4/5 | 4/5 | Stratum corneum a,b | 1/5 | 1/5 | Connective tissue a,b | 0/5 | 0/5 | N/A |
| 35 | 4/5 | 1/5 | Stratum corneum a,b, feather follicle a | 1/5 | 0/5 | Lymphatic a | 0/5 | 0/5 | N/A |
| 42 | 3/5 | 3/5 | Stratum corneum a,b | 2/5 | 1/5 | Connective tissue a, lymphatic a,b | 0/4 | 0/5 | N/A |

a *S*. Heidelberg SH380-*lux* (SH), and b *S*. Typhimurium SL1344-*lux* (ST)

**
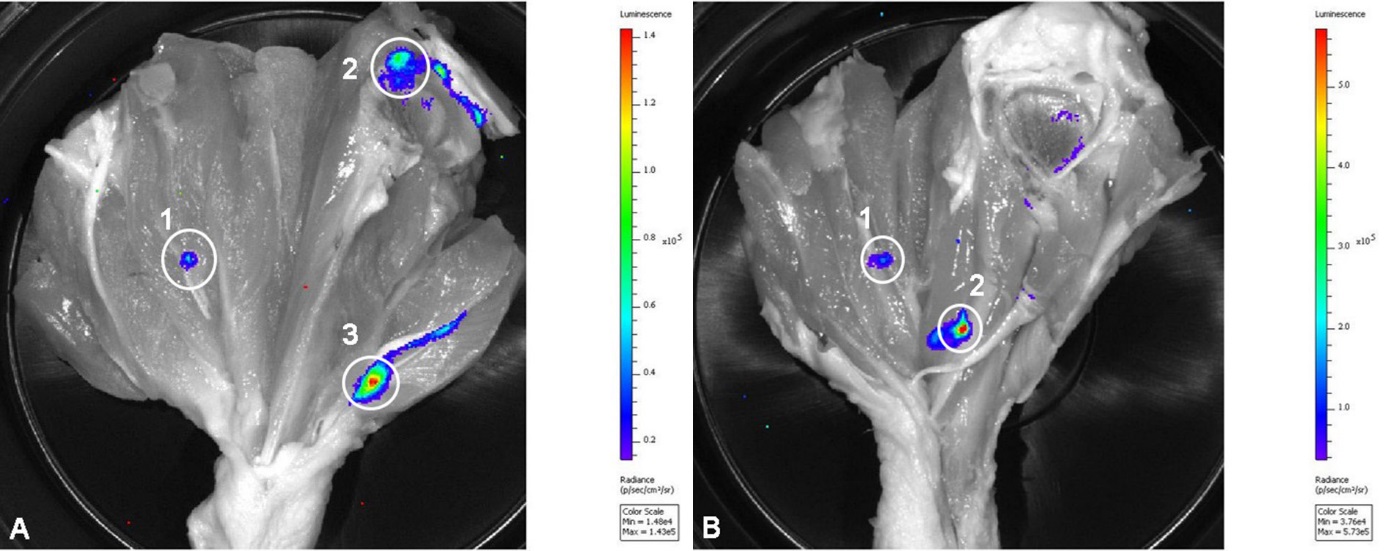
**

**Supplementary Figure 1.** Chicken drumstick injected with *S*. Heidelberg-*lux* and *S*. Typhimurium-*lux*. 0.1 ml of 8x106 CFU *S*. Heidelberg-*lux* **(A)** or *S*. Typhimurium-*lux* **(B)** was injected into chicken legs and imaged using IVIS bioluminescence imaging system. Injection sites are demarcated with white circles and numbered. Total luminescence for injection sites with *S*. Heidelberg-*lux* **(A)** were 9.3 x 102, 5.7 x 103 and 5.9 x 103 p/s/cm²/sr for sites 1, 2, and 3, respectively. Total luminescence for injection sites with *S*. Typhimurium-*lux* **(B)** were 2.4 x 103 and 1.1 x 104 p/s/cm²/sr for sites 1 and 2, respectively.
